# Supplementary material for: Prognostic value of immune checkpoint molecules in breast cancer
Source: Oxford University Press journal article supplement (doi:10.1042/bsr20201054), 2020-06-30
Supplement: bsr-2020-1054_supp.pdf [file bsr-2020-1054_supp.pdf]

A

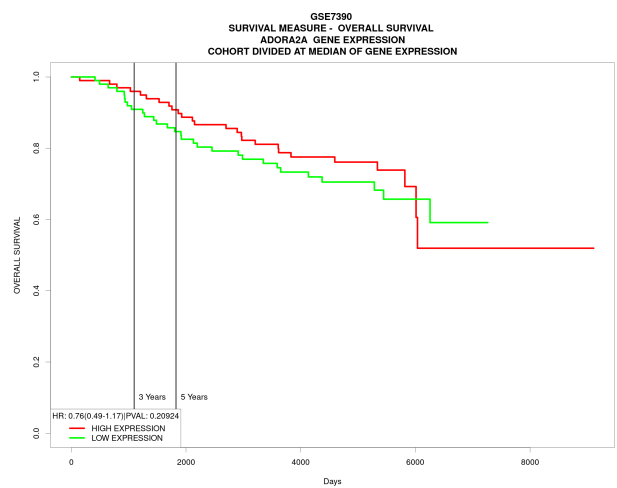

B

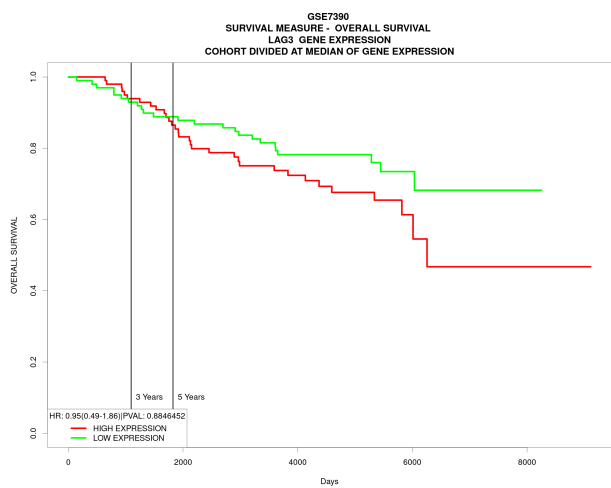

C

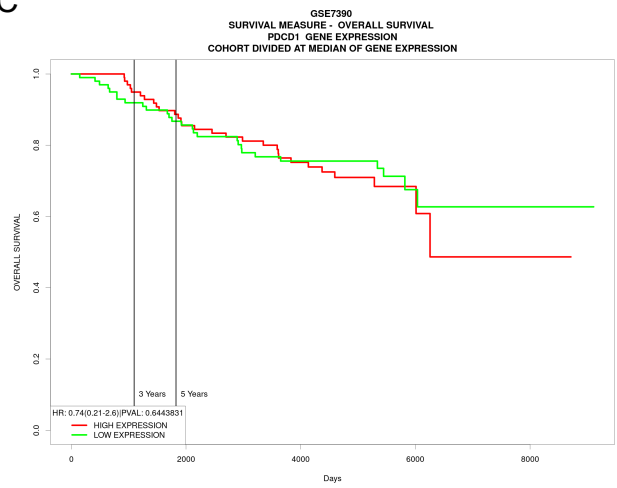

D

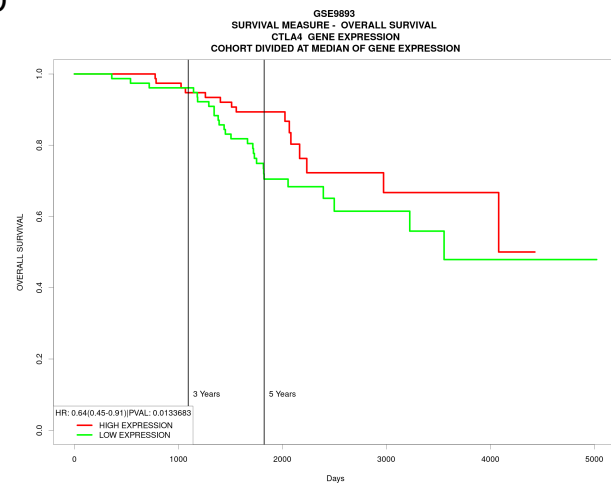

E

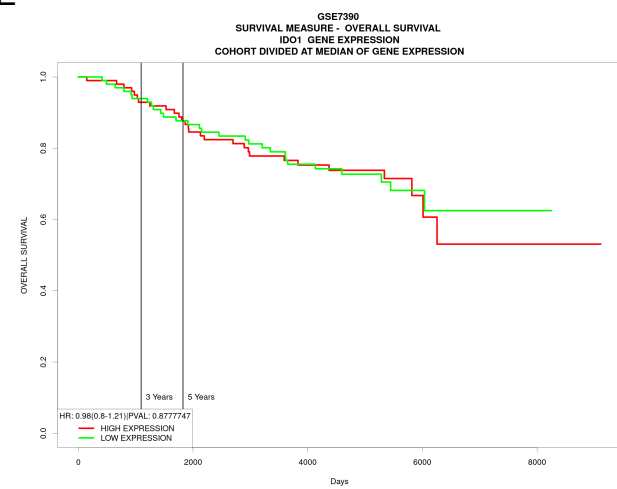

F

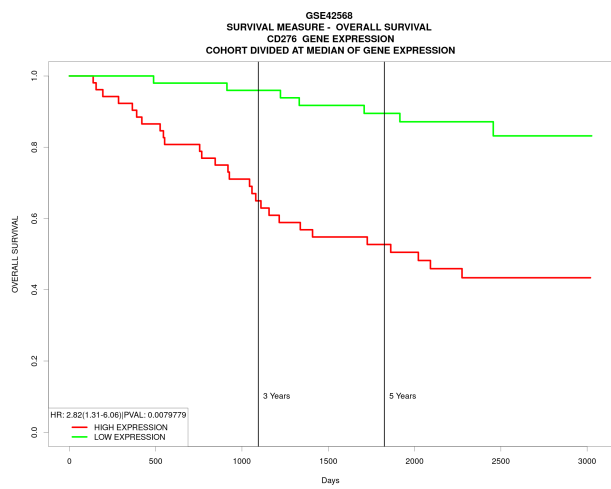

**Supplementary Figure S1** The correlation between immune checkpoint genes and prognosis of breast cancer patients verified by GEO database. (A) The ADORA2A mRNA expression has no relationship with OS (B) The LAG3 mRNA expression has no relationship with OS; (C) The PDCD1 mRNA expression has no relationship with OS; (D) The CTLA4 mRNA expression is associated with a better OS; (E) The IDO1 mRNA expression has no relationship with OS; (F) The B7-H3(CD276) mRNA expression is associated with a worse OS.

.
